# Supplementary material for: Strong orbital deformation due to CH–π interaction in the benzene–methane complex
Source: Royal Society of Chemistry journal article supplement (doi:10.1039/c5cp04684j), 2015-01-01
Supplement: c5cp04684j1.pdf [file c5cp04684j1.pdf]

### Supplementary Information

Supporting Information for the paper entitled “Strong orbital deformation due to CH- $\pi$  interaction in benzene-methane complex” by Jianfu Li, Rui-Qin Zhang\*.

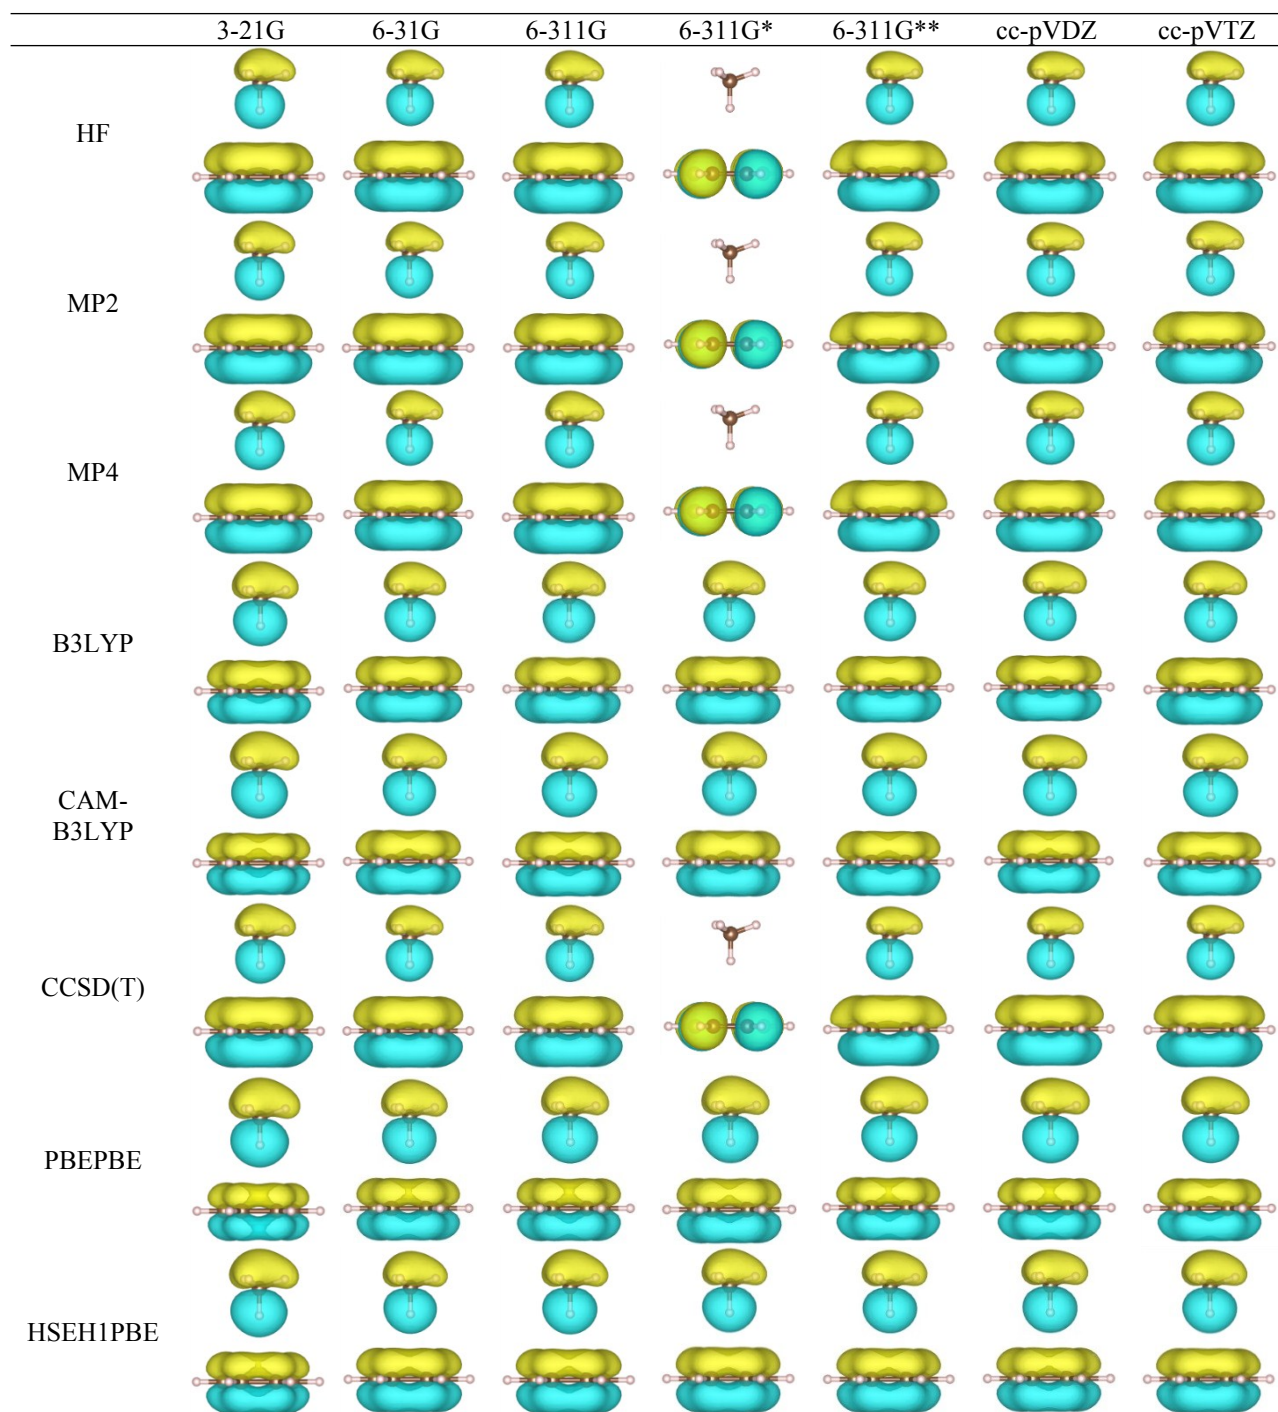

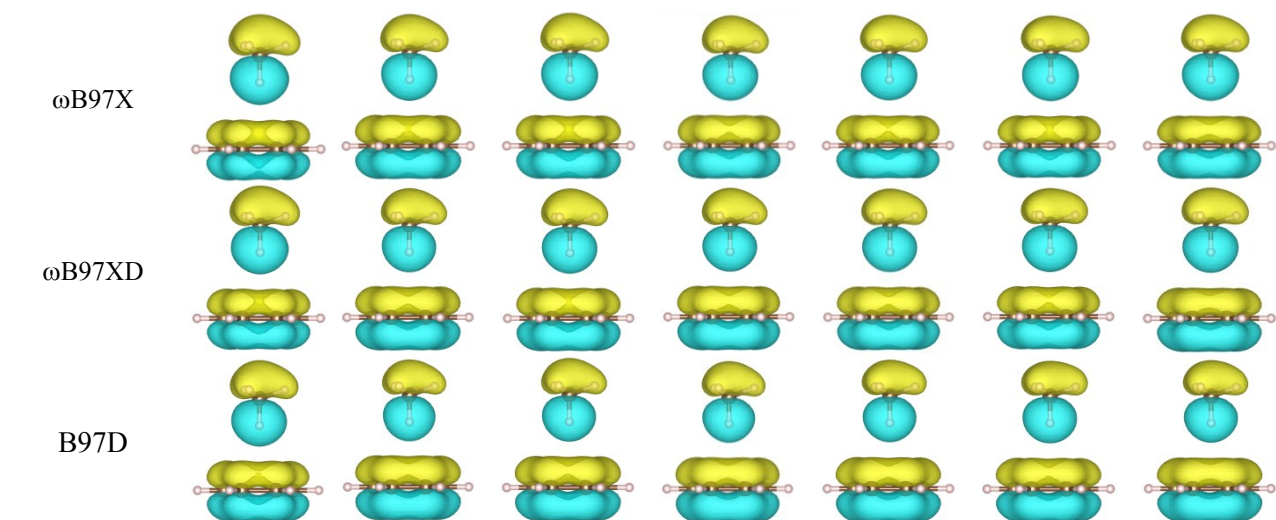

**Fig. A1.** The HOMO-4 of the benzene-methane complex calculated by using different methods and basis sets. The isosurface value is  $\pm 0.03$  and the blue and yellow colors denote negative and positive values, respectively.

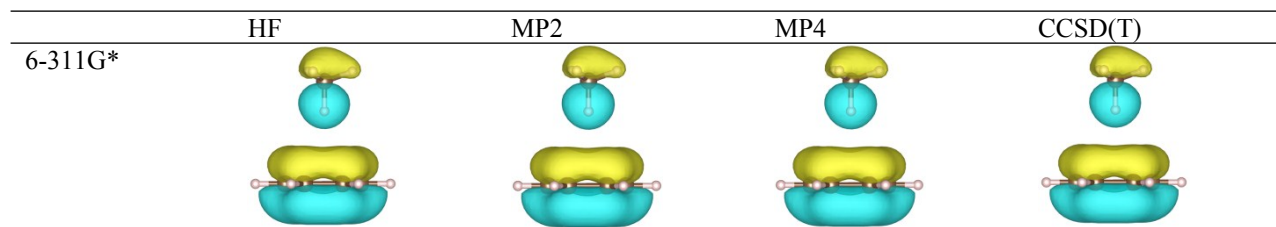

**Fig. A2.** The HOMO-2 of the benzene-methane complex calculated by using different methods and 6-311G\* basis set. The isosurface value is  $\pm 0.03$  and the blue and yellow colors denote negative and positive values, respectively.

**Table A1.** The orbital percentage of  $C_6H_6$  for HOMO-4 of the benzene-methane complex calculated using different methods and basis sets. <sup>a</sup> for HOMO-2.

|                | 3-21G | 6-31G | 6-311G | 6-311G*         | 6-311G** | cc-pVDZ | cc-pVTZ |
|----------------|-------|-------|--------|-----------------|----------|---------|---------|
| HF             | 73    | 80    | 78     | 81 <sup>a</sup> | 80       | 80      | 80      |
| MP2            | 73    | 80    | 78     | 81 <sup>a</sup> | 80       | 80      | 80      |
| MP4            | 73    | 80    | 78     | 81 <sup>a</sup> | 80       | 80      | 80      |
| B3LYP          | 54    | 67    | 64     | 67              | 65       | 63      | 64      |
| CAM-B3LYP      | 47    | 59    | 55     | 59              | 57       | 55      | 56      |
| CCSD(T)        | 73    | 80    | 78     | 81 <sup>a</sup> | 80       | 80      | 80      |
| PBEPBE         | 37    | 52    | 49     | 53              | 50       | 47      | 49      |
| HSEH1PBE       | 45    | 60    | 56     | 59              | 57       | 55      | 57      |
| $\omega$ B97X  | 40    | 52    | 49     | 52              | 48       | 47      | 49      |
| $\omega$ B97XD | 43    | 56    | 48     | 56              | 54       | 51      | 53      |
| B97D           | 53    | 38    | 34     | 37              | 40       | 43      | 41      |
